# Supplementary material
Source: MDPI journal article supplement (https://www.mdpi.com/2071-1050/12/19/8269)
Supplement: s1 [file s1]

## Supplementary material

**Table S 1: The SURFACE expert questionnaire**

| No. | Topics and questions                                                                                                                                                                                                                                                                                                                                                     |
|-----|--------------------------------------------------------------------------------------------------------------------------------------------------------------------------------------------------------------------------------------------------------------------------------------------------------------------------------------------------------------------------|
| 1   | Current situation of land use and land take                                                                                                                                                                                                                                                                                                                              |
| 1.1 | Shortly describe the current situation of land use for residential, industrial, commercial and transportation purposes in your country (in particular recent statistical data about land take). What are the main drivers of land take in your country? Which economic activities / policy sectors are benefiting from land take, which are affected negatively and how? |
| 1.2 | Is there an acknowledged or a legally or otherwise binding definition for the term “land take” in your country?                                                                                                                                                                                                                                                          |
| 1.3 | Given the SDG 15.3 which different forms of land degradation or soil loss (such as erosion, salinization, desertification or contamination) are relevant in your country (if applicable please provide data)?                                                                                                                                                            |
| 2   | Strategies and political background of land take control (incl. SDGs)                                                                                                                                                                                                                                                                                                    |
| 2.1 | Is land take a topic in the political and/or professional debate in your country? Is it perceived as a sustainability issue regarding the implementation of the SDGs?                                                                                                                                                                                                    |
| 2.2 | Are there controversies among different policy sectors / departments with regard to land take and achievement of different SDGs?                                                                                                                                                                                                                                         |
| 2.3 | If your country is a member of the EU: Are there interconnections between land take / land development and European strategies and activities that are relevant in your country?                                                                                                                                                                                         |
| 3   | Goals/objectives and monitoring                                                                                                                                                                                                                                                                                                                                          |
| 3.1 | Are there any targets addressing the problem of land take? If legally binding: Where (i.e. in which law) are they stated? And how do public and private decision-makers have to consider these targets in land development?                                                                                                                                              |
| 3.2 | Who is responsible for monitoring and assessing the attainment of land take goals?                                                                                                                                                                                                                                                                                       |
| 3.3 | Are there any monitoring programs which help to assess changes in land use, especially structural land use changes and their impacts on environmental objectives? Can you provide information, if and how respective data is provided to and assessed by responsible authorities?                                                                                        |
| 3.4 | Based from your experience in your national context: What are suitable indicators for land take that may help to assess progress towards respective political goals?                                                                                                                                                                                                     |
| 4   | Instruments for the reduction of land take                                                                                                                                                                                                                                                                                                                               |
| 4.1 | Which legal, planning, economic or informational instruments to control land take are applied in your country?                                                                                                                                                                                                                                                           |
| 4.2 | Which innovative instruments are currently developed / debated in your country?                                                                                                                                                                                                                                                                                          |

|     |                                                                                                                                                                                                                                                                                                                       |
|-----|-----------------------------------------------------------------------------------------------------------------------------------------------------------------------------------------------------------------------------------------------------------------------------------------------------------------------|
| 5   | Overall assessment of strategies, goals, and instruments to control land take                                                                                                                                                                                                                                         |
| 5.1 | If there are strategies and instruments for controlling land take in your country: How do you assess these approaches? Are there any instruments or legal regulations you would recommend as being particularly effective or innovative? (Please make precise references to your answers in question 2 and 3.         |
| 5.2 | If there are no strategies and instruments for controlling land take: What are in your opinion the deciding reasons that such strategies and instruments are missing? Is there a lack of political motivation, acceptance or awareness of the problem? Are there any constitutional boundaries that form an obstacle? |
| 5.3 | Please give a short appraisal of current or prospective national policy trends regarding the control of land take and related activities to contribute to SDGs 11 and 15.                                                                                                                                             |

**Table S 2: EU policy / science-policy documents considered (in decreasing order of their release)**

| Author                              | Year | Title                                                                                                                                       | Link                                                                                                                                                                                                                                                |
|-------------------------------------|------|---------------------------------------------------------------------------------------------------------------------------------------------|-----------------------------------------------------------------------------------------------------------------------------------------------------------------------------------------------------------------------------------------------------|
| EU Ministers                        | 2019 | Declaration Budapest - Towards a common framework for urban development in the European Union                                               | <a href="https://ec.europa.eu/futurium/en/system/files/ged/2019-06-14_bucharest_declaration_en.pdf">https://ec.europa.eu/futurium/en/system/files/ged/2019-06-14_bucharest_declaration_en.pdf</a>                                                   |
| European Commission                 | 2019 | Commission Staff Working Document: Guidance on a strategic framework for further supporting the deployment of green and blue infrastructure | <a href="https://ec.europa.eu/environment/nature/ecosystems/pdf/SWD_2019_193_F1_STAFF_WORKING_PAPER_EN_V4_P1_1024680.PDF">https://ec.europa.eu/environment/nature/ecosystems/pdf/SWD_2019_193_F1_STAFF_WORKING_PAPER_EN_V4_P1_1024680.PDF</a>       |
| European Environment Agency (EEA)   | 2019 | The European environment – State and outlook 2020                                                                                           | <a href="https://www.eea.europa.eu/publications/soer-2020">https://www.eea.europa.eu/publications/soer-2020</a>                                                                                                                                     |
| Eurostat                            | 2019 | Sustainable development in the European Union. Monitoring report on progress towards the SDGs in an EU context. 2019 edition                | <a href="https://ec.europa.eu/eurostat/documents/3217494/9940483/KS-02-19-165-EN-N.pdf/1965d8f5-4532-49f9-98ca-5334b0652820">https://ec.europa.eu/eurostat/documents/3217494/9940483/KS-02-19-165-EN-N.pdf/1965d8f5-4532-49f9-98ca-5334b0652820</a> |
| Joint Research Centre (JRC)/EEA/ENV | 2019 | Strategic Green Infrastructure and Ecosystem Restoration                                                                                    | <a href="http://publications.jrc.ec.europa.eu/repository/bitstream/JRC113815/jrc-eea-env_joint_report_final_online2.pdf">http://publications.jrc.ec.europa.eu/repository/bitstream/JRC113815/jrc-eea-env_joint_report_final_online2.pdf</a>         |
| ESPON                               | 2018 | COMPASS - Comparative Analysis of Territorial Governance and Spatial Planning Systems in Europe                                             | <a href="https://www.espon.eu/sites/default/files/attachments/1.%20COMPASS_Final_Report.pdf">https://www.espon.eu/sites/default/files/attachments/1.%20COMPASS_Final_Report.pdf</a>                                                                 |
| Eurostat                            | 2018 | Sustainable development in the European Union. Monitoring report on progress towards the SDGs in an EU context. 2018 edition                | <a href="https://op.europa.eu/en/publication-detail/-/publication/409ff6a3-cc38-11e8-9424-01aa75ed71a1/language-en">https://op.europa.eu/en/publication-detail/-/publication/409ff6a3-cc38-11e8-9424-01aa75ed71a1/language-en</a>                   |
| IPBES                               | 2018 | Assessment Report on Land Degradation and Restoration                                                                                       | <a href="https://www.ipbes.net/system/tdf/2018_ldr_full_report_book_v4_pages.pdf?file=1&amp;type=node&amp;id=29395">https://www.ipbes.net/system/tdf/2018_ldr_full_report_book_v4_pages.pdf?file=1&amp;type=node&amp;id=29395</a>                   |
| UN Habitat                          | 2018 | Metadata on SDGs Indicator 11.3.1                                                                                                           | <a href="https://unhabitat.org/sites/default/files/2020/07/metadata_on_sdg_indicator_11.3.1.pdf">https://unhabitat.org/sites/default/files/2020/07/metadata_on_sdg_indicator_11.3.1.pdf</a>                                                         |
| Corbane et al. / JRC                | 2017 | Land Use Efficiency User Guide                                                                                                              | <a href="https://ghsl.jrc.ec.europa.eu/documents/LUE_User_Guide.pdf">https://ghsl.jrc.ec.europa.eu/documents/LUE_User_Guide.pdf</a>                                                                                                                 |
| Ecologic                            | 2017 | Soil Inventory Report                                                                                                                       | <a href="https://www.ecologic.eu/sites/files/publication/2017/2576-soil_inventory_report.pdf">https://www.ecologic.eu/sites/files/publication/2017/2576-soil_inventory_report.pdf</a>                                                               |
| FAO                                 | 2017 | Voluntary Guidelines on Sustainable Soil Management                                                                                         | <a href="http://www.fao.org/3/a-bl813e.pdf">http://www.fao.org/3/a-bl813e.pdf</a>                                                                                                                                                                   |

|                                               |      |                                                                             |                                                                                                                                                                                                                                             |
|-----------------------------------------------|------|-----------------------------------------------------------------------------|---------------------------------------------------------------------------------------------------------------------------------------------------------------------------------------------------------------------------------------------|
| OECD                                          | 2017 | Governing Land-use in OECD countries                                        | <a href="http://www.oecd.org/regional/regional-policy/the-governance-of-land-use-in-oecd-countries-9789264268609-en.htm">http://www.oecd.org/regional/regional-policy/the-governance-of-land-use-in-oecd-countries-9789264268609-en.htm</a> |
| Orr et al. / UNCCD-SPI                        | 2017 | Scientific Conceptual Framework for Land Degradation Neutrality             | <a href="https://www.unccd.int/sites/default/files/documents/2019-06/LDN_CF_report_web-english.pdf">https://www.unccd.int/sites/default/files/documents/2019-06/LDN_CF_report_web-english.pdf</a>                                           |
| UN Habitat                                    | 2017 | Metadata on SDGs Indicator 11.3.1                                           | <a href="https://unhabitat.org/sites/default/files/2020/07/metadata_on_sdg_indicator_11.3.1.pdf">https://unhabitat.org/sites/default/files/2020/07/metadata_on_sdg_indicator_11.3.1.pdf</a>                                                 |
| EEA                                           | 2016 | Land recycling in Europe                                                    | <a href="https://www.eea.europa.eu/publications/land-recycling-in-europe">https://www.eea.europa.eu/publications/land-recycling-in-europe</a>                                                                                               |
| EEA                                           | 2016 | Urban Sprawl in Europe – EEA Report No. 11/2016                             | <a href="https://www.eea.europa.eu/publications/urban-sprawl-in-europe/at_download/file">https://www.eea.europa.eu/publications/urban-sprawl-in-europe/at_download/file</a>                                                                 |
| EU Ministers                                  | 2016 | Pact of Amsterdam – Urban Agenda for the EU                                 | <a href="https://ec.europa.eu/regional_policy/sources/policy/themes/urban-development/agenda/pact-of-amsterdam.pdf">https://ec.europa.eu/regional_policy/sources/policy/themes/urban-development/agenda/pact-of-amsterdam.pdf</a>           |
| European Commission                           | 2016 | Next steps for a sustainable European future                                | <a href="https://eur-lex.europa.eu/legal-content/EN/TXT/PDF/?uri=CELEX:52016DC0739&amp;from=EN">https://eur-lex.europa.eu/legal-content/EN/TXT/PDF/?uri=CELEX:52016DC0739&amp;from=EN</a>                                                   |
| United Nations                                | 2016 | UN Habitat III New Urban Agenda                                             | <a href="http://habitat3.org/wp-content/uploads/NUA-English.pdf">http://habitat3.org/wp-content/uploads/NUA-English.pdf</a>                                                                                                                 |
| EU Ministers                                  | 2015 | Declaration towards the EU Urban Agenda                                     | <a href="http://www.ectp-ceu.eu/images/stories/PDF-docs/Riga_Declaration_agreed_10062015.pdf">http://www.ectp-ceu.eu/images/stories/PDF-docs/Riga_Declaration_agreed_10062015.pdf</a>                                                       |
| FAO / ITPS                                    | 2015 | Status of the World's Soil Resources                                        | <a href="http://www.fao.org/3/i5199e/i5199e.pdf">http://www.fao.org/3/i5199e/i5199e.pdf</a>                                                                                                                                                 |
| Kompil et al. / JRC                           | 2015 | European cities: Territorial analysis of characteristics and trends         | <a href="https://publications.jrc.ec.europa.eu/repository/handle/JRC100001">https://publications.jrc.ec.europa.eu/repository/handle/JRC100001</a>                                                                                           |
| UN Habitat                                    | 2015 | International Guidelines on Urban and Territorial Planning                  | <a href="https://unhabitat.org/books/international-guidelines-on-urban-and-territorial-planning/">https://unhabitat.org/books/international-guidelines-on-urban-and-territorial-planning/</a>                                               |
| BIO by Deloitte                               | 2014 | Study supporting potential land and soil targets                            | <a href="https://op.europa.eu/it/publication-detail/-/publication/fdbdf00a-87ac-4c85-8eab-ef60118963c5">https://op.europa.eu/it/publication-detail/-/publication/fdbdf00a-87ac-4c85-8eab-ef60118963c5</a>                                   |
| European Commission                           | 2014 | The urban dimension of EU policies – key features of an EU urban agenda     | <a href="https://eur-lex.europa.eu/legal-content/EN/TXT/PDF/?uri=CELEX:52014DC0490&amp;from=en">https://eur-lex.europa.eu/legal-content/EN/TXT/PDF/?uri=CELEX:52014DC0490&amp;from=en</a>                                                   |
| Bartke / European Commission's DG Environment | 2013 | Science for Environment Policy: Brownfield Regeneration / Thematic Issue 30 | <a href="https://ec.europa.eu/environment/integration/research/newsalert/pdf/39si_en.pdf">https://ec.europa.eu/environment/integration/research/newsalert/pdf/39si_en.pdf</a>                                                               |

|                               |      |                                                                                                                                  |                                                                                                                                                                                                                                   |
|-------------------------------|------|----------------------------------------------------------------------------------------------------------------------------------|-----------------------------------------------------------------------------------------------------------------------------------------------------------------------------------------------------------------------------------|
| European Commission           | 2013 | Green Infrastructure (GI) – Enhancing Europe’s Natural Capital                                                                   | <a href="https://secure.ipex.eu/IPEXL-WEB/dossier/files/download/082dbcc53dbcb74e013e79e78b782b05.do">https://secure.ipex.eu/IPEXL-WEB/dossier/files/download/082dbcc53dbcb74e013e79e78b782b05.do</a>                             |
| European Parliament & Council | 2013 | EU Environment Action Programme to 2020 (7 <sup>th</sup> EAP)                                                                    | <a href="https://eur-lex.europa.eu/legal-content/EN/TXT/PDF/?uri=CELEX:32013D1386&amp;from=EN">https://eur-lex.europa.eu/legal-content/EN/TXT/PDF/?uri=CELEX:32013D1386&amp;from=EN</a>                                           |
| Lavalle et al. / JRC          | 2013 | Land use related indicators for resource efficiency. Part I Land Take Assessment                                                 | <a href="https://op.europa.eu/en/publication-detail/-/publication/4e6500a9-5367-4919-a936-3e84af794241">https://op.europa.eu/en/publication-detail/-/publication/4e6500a9-5367-4919-a936-3e84af794241</a>                         |
| European Commission           | 2012 | Commission Staff Working Document: Guidelines on best practice to limit, mitigate or compensate soil sealing                     | <a href="http://ec.europa.eu/environment/soil/pdf/soil_sealing_guidelines_en.pdf">http://ec.europa.eu/environment/soil/pdf/soil_sealing_guidelines_en.pdf</a>                                                                     |
| JRC                           | 2012 | The State of Soil in Europe                                                                                                      | <a href="https://publications.jrc.ec.europa.eu/repository/bitstream/JRC68418/lbna25186enn.pdf">https://publications.jrc.ec.europa.eu/repository/bitstream/JRC68418/lbna25186enn.pdf</a>                                           |
| EU Ministers                  | 2011 | Territorial agenda of the EU 2020                                                                                                | <a href="https://ec.europa.eu/regional_policy/sources/policy/what/territorial-cohesion/territorial_agenda_2020.pdf">https://ec.europa.eu/regional_policy/sources/policy/what/territorial-cohesion/territorial_agenda_2020.pdf</a> |
| European Commission           | 2011 | Our life insurance, our natural capital: an EU biodiversity strategy to 2020                                                     | <a href="https://eur-lex.europa.eu/legal-content/EN/TXT/PDF/?uri=CELEX:52011DC0244&amp;from=EN">https://eur-lex.europa.eu/legal-content/EN/TXT/PDF/?uri=CELEX:52011DC0244&amp;from=EN</a>                                         |
| European Commission           | 2011 | Roadmap to a Resource Efficient Europe                                                                                           | <a href="https://eur-lex.europa.eu/legal-content/EN/TXT/PDF/?uri=CELEX:52011DC0571&amp;from=EN">https://eur-lex.europa.eu/legal-content/EN/TXT/PDF/?uri=CELEX:52011DC0571&amp;from=EN</a>                                         |
| JRC                           | 2010 | The State of Soil in Europe. A contribution of the JRC to the European Environment Agency’s Environment State and Outlook Report | <a href="https://publications.jrc.ec.europa.eu/repository/bitstream/JRC68418/lbna25186enn.pdf">https://publications.jrc.ec.europa.eu/repository/bitstream/JRC68418/lbna25186enn.pdf</a>                                           |
| Urban Development Ministers   | 2010 | Toledo Declaration                                                                                                               | <a href="https://ec.europa.eu/regional_policy/archive/newsroom/pdf/201006_toledo_declaration_en.pdf">https://ec.europa.eu/regional_policy/archive/newsroom/pdf/201006_toledo_declaration_en.pdf</a>                               |
| EEA                           | 2006 | Urban Sprawl in Europe. The ignored challenge                                                                                    | <a href="https://www.eea.europa.eu/publications/eea_report_2006_10/eea_report_10_2006.pdf/view">https://www.eea.europa.eu/publications/eea_report_2006_10/eea_report_10_2006.pdf/view</a>                                         |
| European Commission           | 2006 | Thematic Strategy for Soil Protection                                                                                            | <a href="https://eur-lex.europa.eu/legal-content/EN/TXT/PDF/?uri=CELEX:52006DC0231&amp;from=EN">https://eur-lex.europa.eu/legal-content/EN/TXT/PDF/?uri=CELEX:52006DC0231&amp;from=EN</a>                                         |
| EEA                           | 2005 | The European environment – State and outlook                                                                                     | <a href="https://www.eea.europa.eu/about-us/documents/soer2005files">https://www.eea.europa.eu/about-us/documents/soer2005files</a>                                                                                               |
| European Commission           | 2005 | Thematic Strategy on the sustainable use of natural resources                                                                    | <a href="https://eur-lex.europa.eu/legal-content/EN/TXT/PDF/?uri=CELEX:52005DC0670&amp;rid=7">https://eur-lex.europa.eu/legal-content/EN/TXT/PDF/?uri=CELEX:52005DC0670&amp;rid=7</a>                                             |

|                                                   |      |                                                                                                                                                           |                                                                                                                                                                                                                                   |
|---------------------------------------------------|------|-----------------------------------------------------------------------------------------------------------------------------------------------------------|-----------------------------------------------------------------------------------------------------------------------------------------------------------------------------------------------------------------------------------|
| European Commission                               | 2005 | Thematic Strategy on the Urban Environment                                                                                                                | <a href="http://aei.pitt.edu/38667/1/COM_(2005)_718.pdf">http://aei.pitt.edu/38667/1/COM_(2005)_718.pdf</a>                                                                                                                       |
| European Soil Bureau Network, European Commission | 2005 | Soil Atlas of Europe                                                                                                                                      | <a href="https://esdac.jrc.ec.europa.eu/Projects/Soil_Atlas/Download/Atlas.pdf">https://esdac.jrc.ec.europa.eu/Projects/Soil_Atlas/Download/Atlas.pdf</a>                                                                         |
| European Commission                               | 2004 | Towards a thematic strategy on the urban environment                                                                                                      | <a href="https://eur-lex.europa.eu/legal-content/EN/TXT/PDF/?uri=CELEX:52004DC0060&amp;rid=1">https://eur-lex.europa.eu/legal-content/EN/TXT/PDF/?uri=CELEX:52004DC0060&amp;rid=1</a>                                             |
| European Commission                               | 2002 | Towards a Thematic Strategy for Soil Protection                                                                                                           | <a href="https://eur-lex.europa.eu/LexUriServ/LexUriServ.do?uri=COM:2002:0179:FIN:EN:PDF">https://eur-lex.europa.eu/LexUriServ/LexUriServ.do?uri=COM:2002:0179:FIN:EN:PDF</a>                                                     |
| European Commission                               | 2001 | A Sustainable Europe for a Better World: A European Union Strategy for Sustainable Development (Commission's proposal to the Gothenburg European Council) | <a href="https://eur-lex.europa.eu/legal-content/EN/TXT/PDF/?uri=CELEX:52001DC0264&amp;from=EN">https://eur-lex.europa.eu/legal-content/EN/TXT/PDF/?uri=CELEX:52001DC0264&amp;from=EN</a>                                         |
| Council of Europe                                 | 2000 | European Landscape Convention                                                                                                                             | <a href="https://rm.coe.int/CoERMPublicCommonSearchServices/DisplayDCTMContent?documentId=0900001680080621">https://rm.coe.int/CoERMPublicCommonSearchServices/DisplayDCTMContent?documentId=0900001680080621</a>                 |
| EU Ministers                                      | 1999 | European Spatial Development Perspective – Towards Balanced and Sustainable Development of the Territory of the European Union                            | <a href="https://ec.europa.eu/regional_policy/sources/docoffic/official/reports/pdf/sum_en.pdf">https://ec.europa.eu/regional_policy/sources/docoffic/official/reports/pdf/sum_en.pdf</a>                                         |
| European Commission                               | 1998 | Sustainable Urban Development in the European Union: A Framework for Action                                                                               | <a href="https://op.europa.eu/en/publication-detail/-/publication/9ee272dd-f478-44d5-88a1-95a101904ab9/language-en">https://op.europa.eu/en/publication-detail/-/publication/9ee272dd-f478-44d5-88a1-95a101904ab9/language-en</a> |
| European Commission                               | 1997 | Towards an urban agenda in the European Union                                                                                                             | <a href="https://ec.europa.eu/regional_policy/sources/docoffic/official/communic/pdf/urban/urban_197_en.pdf">https://ec.europa.eu/regional_policy/sources/docoffic/official/communic/pdf/urban/urban_197_en.pdf</a>               |
